# Supplementary material for: The Gene vepN Regulated by Global Regulatory Factor veA That Affects Aflatoxin Production, Morphological Development and Pathogenicity in Aspergillus flavus
Source: MDPI journal article supplement (doi:10.3390/toxins16040174), 2024-04-03
Supplement: s1 [file s1]

**Table S1.** Primers used in strategies and confirmation of the mutant strain.

| Primer name | Sequence (5' -3')                    |
|-------------|--------------------------------------|
| pyrG-F      | GAGAGTTATTCTGTGTCTGACGAAAT           |
| pyrG-R      | ATTCTGTCTGAGAGGAGGCA                 |
| vepN-5F     | CGTGGGGATAATCCCCAAGCCT               |
| vepN-5R     | GACACAGAATAACTCTCGCCTCCCTTTTGCTCTGT  |
| vepN-3F     | CTCCTCTCAGACAGAATGGTAGGTAACAGGTGAGGA |
| vepN-3R     | CCGCATCCCTTGTATGGTAGTCAGTAGT         |
| vepN-F      | ATGAGACCGCCTGTCCCGGAT                |
| vepN-R      | CTCATCTCCGAGAGTACGCGATGA             |
| vepN-5Fp    | CGCCACTCAGAGAACTTCGTG                |
| vepN-5Rp    | CTGGCCCAGACCGCATCTGC                 |
| vepN-3Fp    | GCAAGACTTCCCCTATGGTCCT               |
| vepN-3Rp    | CTGACTACCATACAAGGGATGCGG             |

**Table S2.** Primers used in strategies and confirmation of the complemented strain.

| Primer name | Sequence (5' -3')                              |
|-------------|------------------------------------------------|
| FA-vector-F | CGAATCATGAAATCAGGGCGCGTCAGC                    |
| FA-vector-R | TCTCTGAGTGGCGGCCGCATAGTTAAGCCAGC               |
| FB-5UTR-F   | TAACTATGCGGCCGCGCCACTCAGAGAACTTCGTG            |
| FB-5UTR-R   | GACCTCCACTAGCGCCTCCCTTTTGCTCTGTTCTG            |
| FC-ble-F    | AAAAAGGGAGGCGCTAGTGGAGGTCAACACATCAATG          |
| FC-ble-R    | AGGGAGCTTACGCCTAAACAAGTGTACCTGTGCATTCTGG       |
| FD-vepN-F   | ACACTTGTTTAGGCGTAAGCTCCCTAATTGGCC              |
| FD-vepN-R   | CCTGTTACCTACCGTATTGGGATGAATTTGTATGCACGCG       |
| FE-3UTR-F   | TCATCCCAATACGGTAGGTAACAGGTGAGGAGAACTTATACAAG   |
| FE-3UTR-R   | TGACGCGCCCTGATTTTCATGATTTCGGAAATTCCACTAGACAGAG |

**Table S3.** Primers used in RT-qPCR and sequencing.

| Primer name | Sequence (5' -3')                    |
|-------------|--------------------------------------|
| 18S-F       | TGATGACCCGCTCGGCACCTTACGAGAAATCAAAGT |
| 18S-R       | GGCCATGCACCACCATCCAAAAGATCAAGAAAGAGC |
| veA-F       | TTCACCGTATTTAGCGCCAAG                |
| veA-R       | CATCACGTCGAATCCGCACAC                |
| laeA-F      | GAAAGAAAGGTTGCTCGCTGGTA              |
| laeA-F      | GTTGAACGCCTCCGACTTGAC                |
| brlA-F      | TATCCAGACATTCAAGACGCACAG             |
| brlA-R      | GATAATAGAGGGCAAGTTCTCCAAAG           |
| abaA-F      | TCTTCGGTTGATGGATGATTC                |
| abaA-R      | CCGTTGGGAGGCTGGGT                    |
| nsdC-F      | GCCAGACTTGCCAATCAC                   |
| nsdC-R      | CATCCACCTTGCCCTTA                    |
| nsdD-F      | GGACTTGCGGGTCGTGCTA                  |

|        |                        |
|--------|------------------------|
| nsdD-R | AGAACGCTGGGTCTGGTGC    |
| sclR-F | CAATGAGCCTATGGGAGTGG   |
| sclR-R | ATCTTCGCCCCGAGTGGTT    |
| aflR-F | AACAAGAGGGCTACCGATGC   |
| aflR-R | TACCATGCCAGCACCTTGAG   |
| aflS-F | ATGTGCGAATCCTATCCCCC   |
| aflS-R | ACGAGGAAACGGAGTGATGG   |
| aflC-F | ACGGAATTTGGTCCCGATGG   |
| aflC-R | GTCAGCATCCAGGTCCGTTC   |
| aflD-F | CGCCTGAGGAGACGGTGTATT  |
| aflD-R | CTGCCTTCAGCGACGGTTAG   |
| aflO-F | CTTTCGGCAGTGACCTAACC   |
| aflO-R | TCTTGA ACTATAAGGCGACCA |
| aflQ-F | GTCGCATATGCCCCGGTCGG   |
| aflQ-R | GGCAACCAGTCGGGTCCGG    |
| aflM-F | CCGTTTAGATGGCAAAGTGGC  |
| aflM-R | TCACGGGAATGGGCGTAGTT   |

---
